# Supplementary material
Source: PubMed Central journal article supplement (PMC1480432)
Supplement: pnas_0603694103_1.pdf [file pnas_0603694103_1.pdf]

## Supporting Materials and Methods

DNA sequence and deduced amino acid sequence of His-tagged human methionine synthase (hMS) reductase (hMSR) expressed from pFBHT(hMSR<sup>I</sup>). The underlined "CATCACCATCACCATCAC" sequence specifies the His-6-tag. The underlined "ATG" with italic letters indicates the original translational start site. The stop codon "TAA" is shown in underlined bold type.

|                                                                        |     |
|------------------------------------------------------------------------|-----|
| ATGTCGTACTACC <u>CATCACCATCACCATCAC</u> GATTACGATATCCCAACGACCGAAAACCTG | 60  |
| M S Y Y <u>H H H H H H</u> D Y D I P T T E N L                         | 20  |
| TATTTTCAGGGCGCC <u>ATG</u> GGATCCATGAGGAGGTTTCTGTTACTATATGCTACACAGCAG  | 120 |
| Y F Q G A M G S M R R F L L L Y A T Q Q                                | 40  |
| GGACAGGCAAAGGCCATCGCAGAAGAAATATGTGAGCAAGCTGTGGTACATGGATTTTCT           | 180 |
| G Q A K A I A E E I C E Q A V V H G F S                                | 60  |
| GCAGATCTTCACTGTATTAGTGAATCCGATAAGTATGACCTAAAAACCGAAACAGCTCCT           | 240 |
| A D L H C I S E S D K Y D L K T E T A P                                | 80  |
| CTTGTTGTTGTGGTTTTCTACGACGGGCACCGGAGACCCACCCGACACAGCCCGCAAGTTT          | 300 |
| L V V V V S T T G T G D P P D T A R K F                                | 100 |
| GTTAAGGAAATACAGAACCAAACACTGCCGGTTGATTTCTTTGCTCACCTGCGGTATGGG           | 360 |
| V K E I Q N Q T L P V D F F A H L R Y G                                | 120 |
| TTACTGGGTCTCGGTGATTGAGAATACACCTACTTTTTGCAATGGGGGAAGATAAATTGAT          | 420 |
| L L G L G D S E Y T Y F C N G G K I I D                                | 140 |
| AAACGACTTCAAGAGCTTGGAGCCCGGCATTTCTATGACACTGGACATGCAGATGACTGT           | 480 |
| K R L Q E L G A R H F Y D T G H A D D C                                | 150 |
| GTAGGTTTGAAGTGTGGTTGAGCCGTGGATTGCTGGACTCTGGCCAGCCCTCAGAAAG             | 540 |
| V G L E L V V E P W I A G L W P A L R K                                | 180 |
| CATTTTAGGTCAAGCAGAGGACAAGAGGAGATAAGTGGCGCACTCCCGGTGGCATCACCT           | 600 |
| H F R S S R G Q E E I S G A L P V A S P                                | 200 |
| GCATCCTTAAGGACAGACCTTGTGAAGTCAGAGCTGCTACACATTGAATCTCAAGTCGAG           | 660 |
| A S L R T D L V K S E L L H I E S Q V E                                | 220 |
| CTTCTGAGATTCGATGATTCAGGAAGAAAGGATTCTGAGGTTTTGAAGCAAAATGCAGTG           | 720 |
| L L R F D D S G R K D S E V L K Q N A V                                | 240 |
| AACAGCAACCAATCCAATGTTGTAATTGAAGACTTTGAGTCCTCACTTACCCGTTTCGGTA          | 780 |
| N S N Q S N V V I E D F E S S L T R S V                                | 260 |
| CCCCACTCTCACAAGCCTCTCTGAATATTCCTGGTTTACCCCCAGAATATTTACAGGTA            | 840 |
| P P L S Q A S L N I P G L P P E Y L Q V                                | 280 |
| CATCTGCAGGAGTCTCTTGGCCAGGAGAAAGCCAAGTATCTGTGACTTCAGCAGATCCA            | 900 |
| H L Q E S L G Q E E S Q V S V T S A D P                                | 300 |
| GTTTTTCAAGTGCCAATTTCAAAGGCAGTTCAACTTACTACGAATGATGCCATAAAAACC           | 960 |
| V F Q V P I S K A V Q L T T N D A I K T                                | 320 |

|                                                                |                                                     |      |
|----------------------------------------------------------------|-----------------------------------------------------|------|
| ACTCTGCTGGT                                                    | TAGAATTGGACATTTCAAATACAGACTTTTTCCTATCAGCCTGGAGATGCC | 1020 |
| T L L V E L D I S N T D F S Y Q P G D A                        |                                                     | 340  |
| TTCAGCGTGATCTGCCCTAACAGTGATTCTGAGGTACAAAGCCTACTCCAAAGACTGCAG   |                                                     | 1080 |
| F S V I C P N S D S E V Q S L L Q R L Q                        |                                                     | 360  |
| CTTGAAGATAAAAAGAGAGCACTGCGTCCTTTTGGAAAATAAAGGCAGACACAAAGAAGAAA |                                                     | 1140 |
| L E D K R E H C V L L K I K A D T K K K                        |                                                     | 380  |
| GGAGCTACCTTACCCAGCATATACCTGCGGGATGTTCTCTCCAGTTCATTTTTACCTGG    |                                                     | 1200 |
| G A T L P Q H I P A G C S L Q F I F T W                        |                                                     | 400  |
| TGTCTTGAATCCGAGCAATTCCTAAAAAGGCATTTTTACGAGCCCTTGTGGACTATAACC   |                                                     | 1260 |
| C L E I R A I P K K A F L R A L V D Y T                        |                                                     | 420  |
| AGTGACAGTGCTGAAAAGCGCAGGCTACAGGAGCTGTGCAGTAAACAAGGGGCAGCCGAT   |                                                     | 1320 |
| S D S A E K R R L Q E L C S K Q G A A D                        |                                                     | 440  |
| TATAGCCGCTTTGTACGAGATGCCTGTGCCTGCTTGTGGATCTCCTCCTCGCTTTCCCT    |                                                     | 1380 |
| Y S R F V R D A C A C L L D L L L A F P                        |                                                     | 460  |
| TCTTGCCAGCCACCACTCAGTCTCCTGCTCGAACATCTTCTAAACTTCAACCCAGACCA    |                                                     | 1440 |
| S C Q P P L S L L L E H L P K L Q P R P                        |                                                     | 480  |
| TATTCGTGTGCAAGCTCAAGTTTATTTACCCAGGAAAGCTCCATTTTGTCTTCAACATT    |                                                     | 1500 |
| Y S C A S S S L F H P G K L H F V F N I                        |                                                     | 500  |
| GTGGAATTTCTGTCTACTGCCACAACAGAGGTTCTGCGGAAGGGAGTATGTACAGGCTGG   |                                                     | 1560 |
| V E F L S T A T T E V L R K G V C T G W                        |                                                     | 520  |
| CTGGCCTTGTGGTTGCTTCAGTTCTTCAGCCAAACATACATGCATCCCACGAAGACAGC    |                                                     | 1620 |
| L A L L V A S V L Q P N I H A S H E D S                        |                                                     | 540  |
| GGGAAAGCCCTGGCTCCTAAGATATCCATCTCTCCTCGAACAAACAATTCTTTCCACTTA   |                                                     | 1680 |
| G K A L A P K I S I S P R T T N S F H L                        |                                                     | 560  |
| CCAGATGACCCCTCAATCCCCATCATAATGGTGGGTCCAGGAACCGGCATAGCCCCGTTT   |                                                     | 1740 |
| P D D P S I P I I M V G P G T G I A P F                        |                                                     | 580  |
| ATTGGGTTCTTACAACATAGAGAGAAACTCCAAGAACAACCCAGACGGAAATTTTGGAA    |                                                     | 1800 |
| I G F L Q H R E K L Q E Q H P D G N F G                        |                                                     | 600  |
| GCAATGTGGTTGTTTTTTGGCTGCAGGCATAAGGATAGGGATTATCTATTTCAGAAAAGAG  |                                                     | 1860 |
| A M W L F F G C R H K D R D Y L F R K E                        |                                                     | 620  |
| CTCAGACATTTCTTAAAGCATGGGATCTTAACTCATCTAAAGGTTTCTTCTCAAGAGAC    |                                                     | 1920 |
| L R H F L K H G I L T H L K V S F S R D                        |                                                     | 640  |
| GCTCCTGTTGGGGAGGAGGAAGCCCCAGCAAAGTATGTGCAAGACAACATCCAGCTTCAT   |                                                     | 1980 |
| A P V G E E E A P A K Y V Q D N I Q L H                        |                                                     | 660  |
| GGCCAGCAGGTGGCGAGAATCCTCCTCCAGGAGAACGGCCATATTTATGTGTGTGGAGAT   |                                                     | 2040 |
| G Q Q V A R I L L Q E N G H I Y V C G D                        |                                                     | 680  |
| GCAAAGAATATGGCCAAGGATGTACATGATGCCCTTGTGCAAATAATAAGCAAAGAGGTT   |                                                     | 2100 |
| A K N M A K D V H D A L V Q I I S K E V                        |                                                     | 700  |
| GGAGTTGAAAAACTAGAAGCAATGAAAACCCTGGCCACTTTAAAAGAAGAAAAACGCTAC   |                                                     | 2160 |
| G V E K L E A M K T L A T L K E E K R Y                        |                                                     | 720  |
| CTTCAGGATATTTGGTCA                                             | <u>TAA</u> GTGACGAGCTCACTAGTCGCGGCCGCT              | 2209 |
| L Q D I W S *                                                  |                                                     | 726  |
